# Supplementary material for: Epigenetic Silencing of DKK3 in Medulloblastoma
Source: Int J Mol Sci. 2013 Apr 8;14(4):7492–505. doi: 10.3390/ijms14047492 (PMC3645699; doi:10.3390/ijms14047492)
Supplement: Supplementary file 1 [file ijms-14-07492-s001.pdf]

## Supplementary Information

**Figure S1.** Dot plots of *DKK1* expression values in medulloblastoma samples (MB) and normal cerebellum (NC) from four independent datasets by gene expression analysis: (A) 19 MB tumors and two pools of NC (present dataset); (B) 188 MBs and 11 NC data [4]; (C) 62 MB data [2] and nine NC [20]; (D) 64 MB data [5]. Differences between two groups were studied using the two-tailed Student's *t*-test (MB samples versus NC and WNT subgroup *versus* NC in dataset A, B, C, respectively). *p* values < 0.01 were considered to be statistically significant (\*\*). The X-axis indicates the samples grouped into the four molecular subgroups {[7]; WNT, SHH, Group 3 (GRP3) and Group 4 (GRP4)}. The dataset A was not divided in these subgroups, due to a reduced number of samples. Abbreviations: NC, normal cerebellum; MB, medulloblastoma; GRP3, Group 3; GRP4, Group 4.

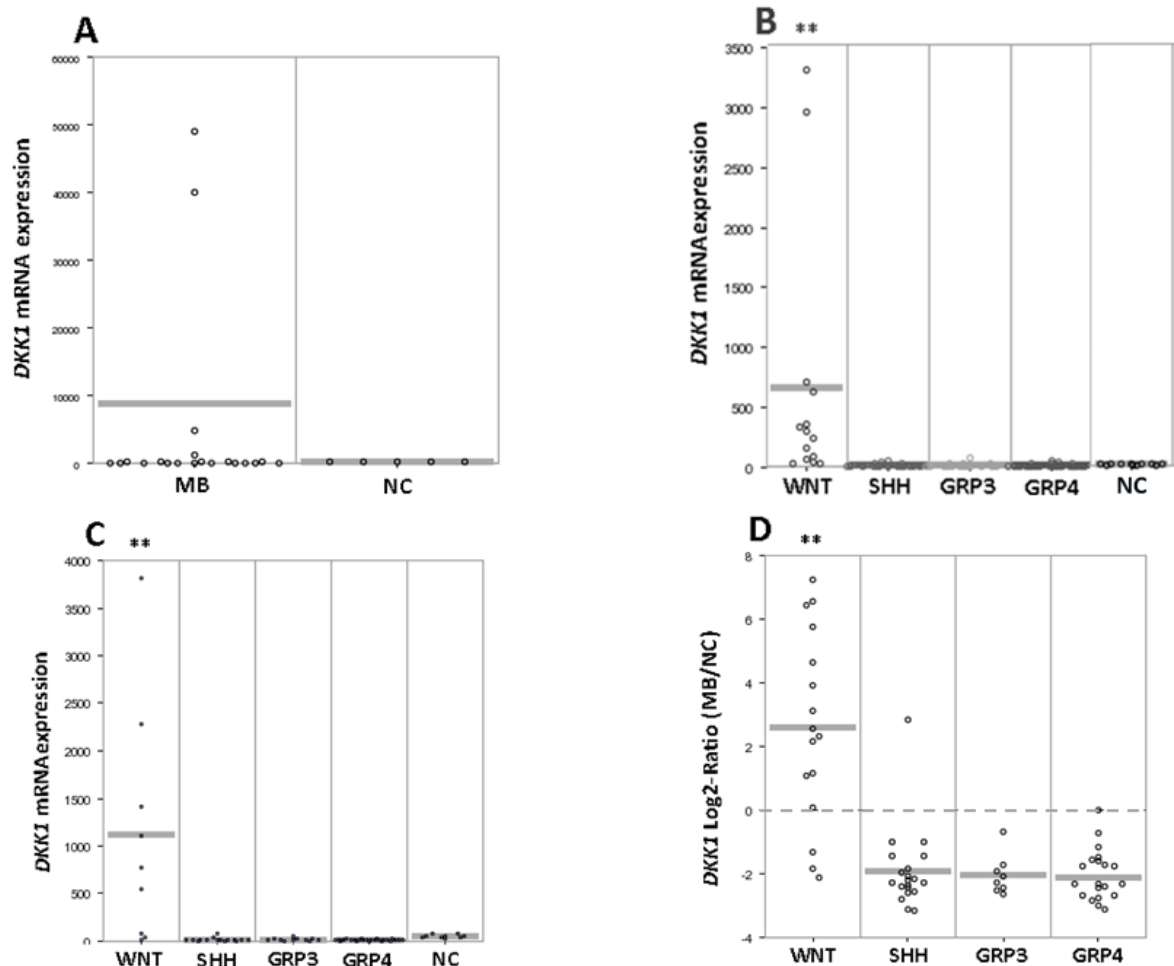

**Figure S2.** Dot plots of *DKK2* expression values in medulloblastoma samples (MB) and normal cerebellum (NC) from four independent datasets by gene expression analysis: (A) 19 MB tumors and two pools of NC (present dataset); (B) 188 MBs and 11 NC data [4]; (C) 62 MB data [2] and nine NC [20]. Differences between two groups (MB samples versus NC and WNT subgroup *versus* NC) were studied using the two-tailed Student's *t*-test. *p* values < 0.01 were considered to be statistically significant (\*\*). The X-axis indicates the samples grouped into the four molecular subgroups {[7]; WNT, SHH, Group 3 (GRP3) and Group 4 (GRP4)}. The dataset A was not divided in these subgroups, due to a reduced number of samples. The dataset D is not present because *DKK2* probes were removed after data normalization since more than 80% values across all samples are missed. Abbreviations: NC, normal cerebellum; MB, medulloblastoma; GRP3, Group 3; GRP4, Group 4.

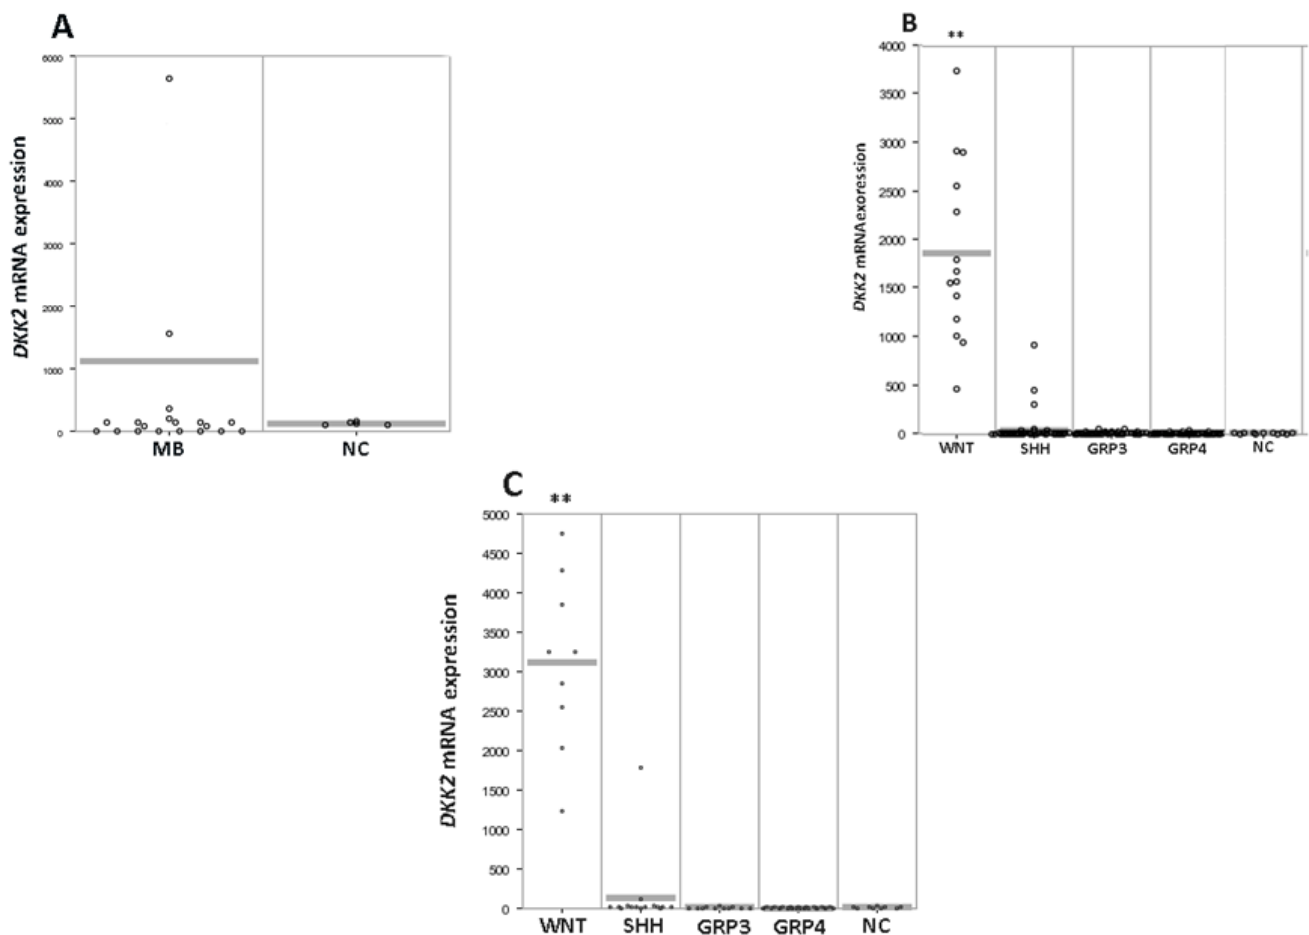

**Figure S3.** Dot plots of *DKK4* expression values in medulloblastoma samples (MB) and normal cerebellum (NC) from four independent datasets by gene expression analysis: (A) 19 MB tumors and 2 pools of NC (present dataset); (B) 188 MBs and 11 NC data [4]; (C) 62 MB data [2] and 9 NC [20]. Differences between two groups (MB samples *versus* NC and WNT subgroup *versus* NC) were studied using the two-tailed Student's *t*-test. *p* values < 0.01 were considered to be statistically significant (\*\*). The X-axis indicates the samples grouped into the four molecular subgroups {[7]; WNT, SHH, Group 3 (GRP3) and Group 4 (GRP4)}. The dataset A was not divided in these subgroups, due to a reduced number of samples. The dataset D is not present because *DKK4* probes were removed after data normalization since more than 80% values across all samples are missed. Abbreviations: NC, normal cerebellum; MB, medulloblastoma; GRP3, Group 3; GRP4, Group 4.

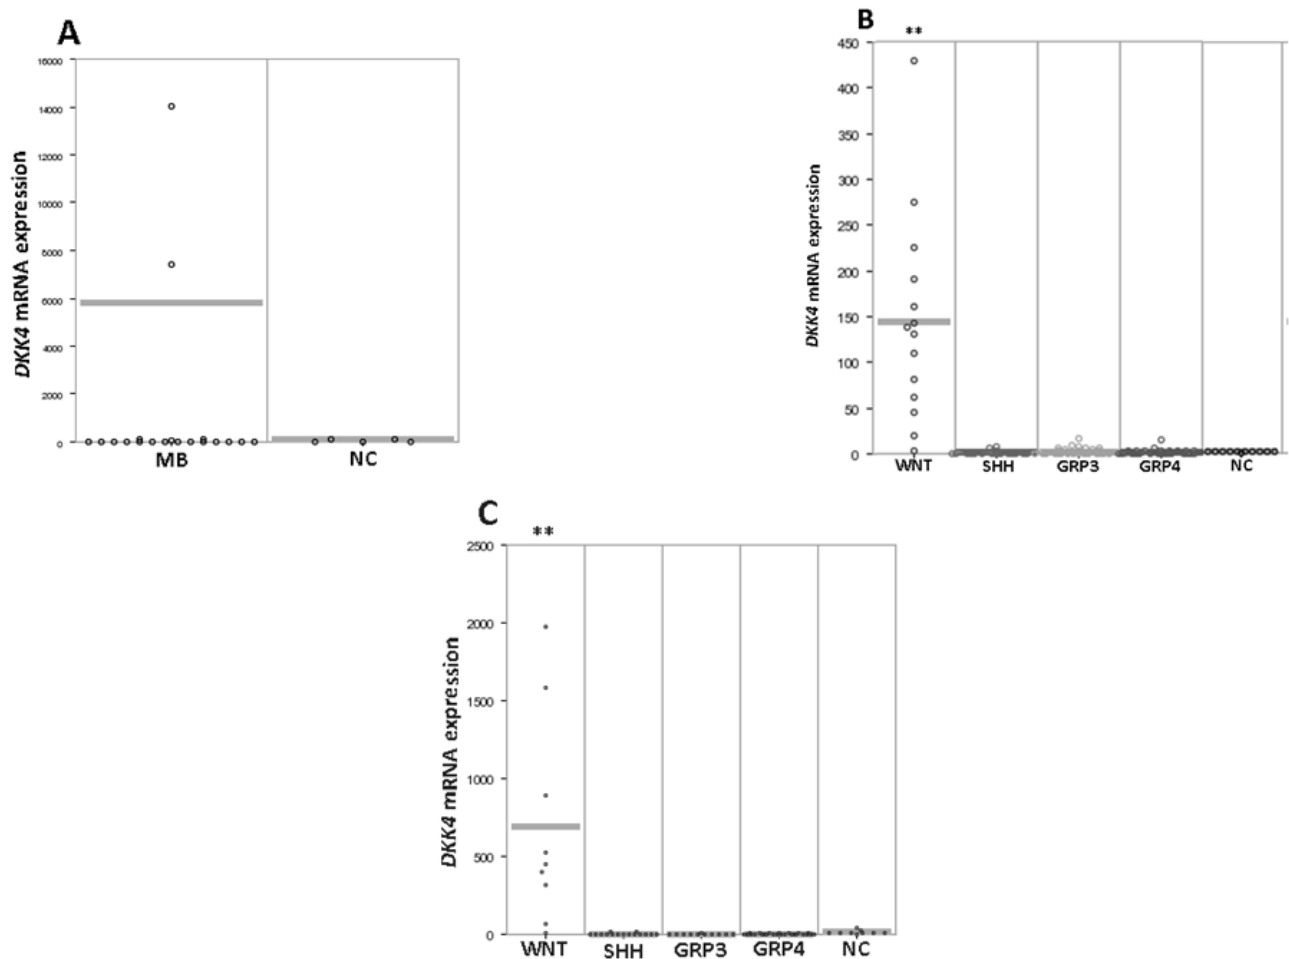

**Figure S4.** Representative pyrograms of the methylation level of the three *DKK3*'s promoter regions (promoter 1, 2 and 3) of three MB tumor samples.

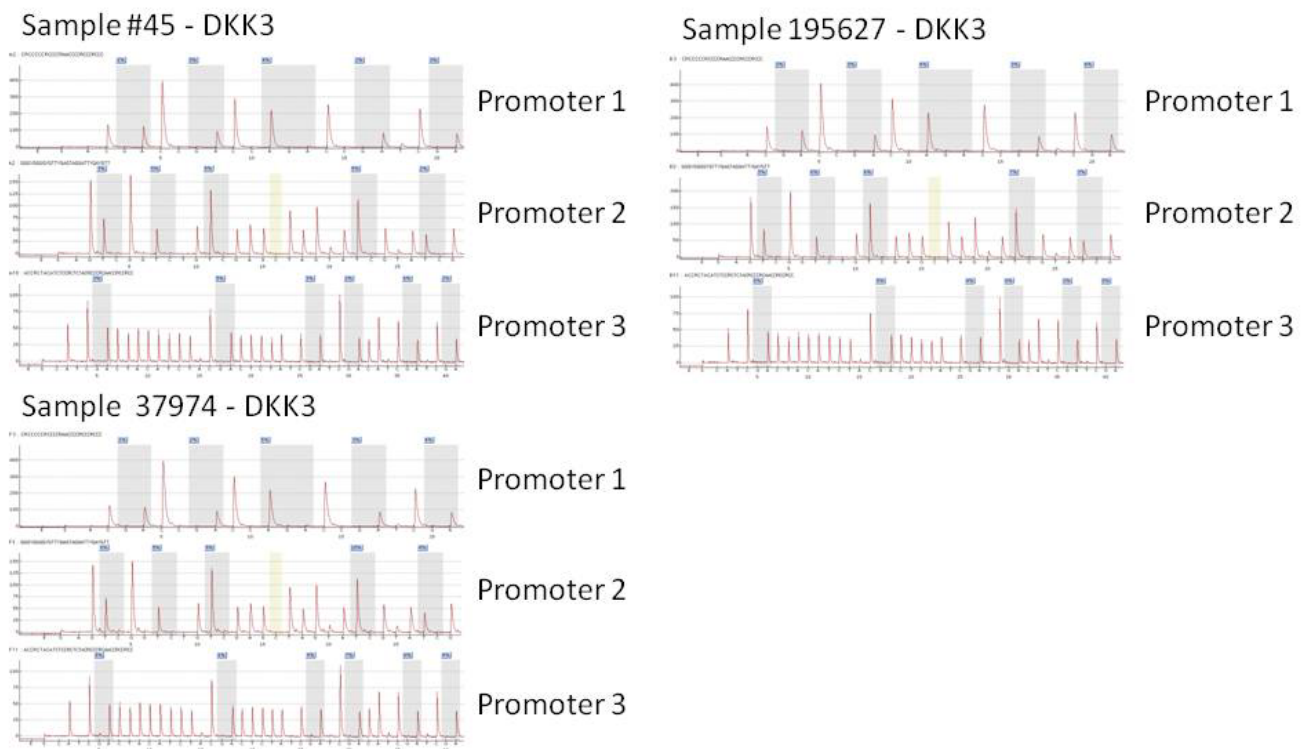

**Table S1.** Predictive microRNAs on *DKK3* 3' UTR region by 5 predictive tools. Predictive microRNAs on *DKK3* 3' UTR region was identified using five miRNA target prediction programs: miRWalk, Diana-microT; miRanda, miRDB and TargetScan. We selected 147 miRNAs present in at least 3 out of 5 five predictive tools; 77 out of 147 the expression values were present. The analysis was performed using the miRNA/mRNA expression data available from 25 tumors of dataset D. Statistical analysis was performed calculating the respective Pearson's rank correlation coefficient and a significant negative correlation was defined for  $r_2 < -0.5$ . 1: miRNA present in the prediction program; 0: absent. In the column SUM is reported how many time each miRNA is present in the prediction programs.

| MicroRNA        | DIANAmT | miRanda | miRDB | miRWalk | Targetscan | SUM | Pearson's<br>inverse<br>correlation<br>coefficient |
|-----------------|---------|---------|-------|---------|------------|-----|----------------------------------------------------|
| hsa-miR-371-5p  | 1       | 1       | 1     | 1       | 1          | 5   | -0.285075443                                       |
| hsa-miR-488     | 1       | 1       | 1     | 1       | 1          | 5   | -0.095653899                                       |
| hsa-miR-450b-5p | 1       | 1       | 1     | 1       | 1          | 5   | not present                                        |
| hsa-miR-579     | 1       | 1       | 1     | 1       | 1          | 5   | not present                                        |
| hsa-miR-657     | 1       | 1       | 1     | 1       | 1          | 5   | not present                                        |
| hsa-miR-891b    | 1       | 1       | 1     | 1       | 1          | 5   | not present                                        |
| hsa-miR-939     | 1       | 1       | 1     | 1       | 1          | 5   | not present                                        |
| hsa-miR-518a-5p | 1       | 1       | 0     | 1       | 1          | 4   | -0.468876521                                       |

|                 |   |   |   |   |   |   |              |
|-----------------|---|---|---|---|---|---|--------------|
| hsa-miR-507     | 1 | 1 | 0 | 1 | 1 | 4 | -0.437143413 |
| hsa-miR-92a     | 1 | 1 | 0 | 1 | 1 | 4 | -0.429416337 |
| hsa-miR-92b     | 1 | 1 | 0 | 1 | 1 | 4 | -0.405626744 |
| hsa-miR-25      | 1 | 1 | 0 | 1 | 1 | 4 | -0.356534956 |
| hsa-miR-324-3p  | 1 | 1 | 0 | 1 | 1 | 4 | -0.351934904 |
| hsa-miR-28-5p   | 1 | 1 | 0 | 1 | 1 | 4 | -0.332536363 |
| hsa-miR-506     | 1 | 1 | 0 | 1 | 1 | 4 | -0.313189581 |
| hsa-miR-212     | 1 | 1 | 0 | 1 | 1 | 4 | -0.308035243 |
| hsa-miR-146a    | 1 | 1 | 0 | 1 | 1 | 4 | -0.29605848  |
| hsa-miR-345     | 1 | 1 | 0 | 1 | 1 | 4 | -0.260334671 |
| hsa-miR-452     | 1 | 1 | 0 | 1 | 1 | 4 | -0.244987603 |
| hsa-miR-515-5p  | 1 | 1 | 0 | 1 | 1 | 4 | -0.237850331 |
| hsa-miR-185     | 1 | 1 | 0 | 1 | 1 | 4 | -0.236411384 |
| hsa-let-7c      | 1 | 1 | 0 | 1 | 1 | 4 | -0.228371113 |
| hsa-miR-423-3p  | 1 | 1 | 0 | 1 | 1 | 4 | -0.222941009 |
| hsa-miR-132     | 1 | 1 | 0 | 1 | 1 | 4 | -0.221660544 |
| hsa-let-7f      | 1 | 1 | 0 | 1 | 1 | 4 | -0.218559008 |
| hsa-miR-199b-3p | 1 | 1 | 0 | 1 | 1 | 4 | -0.213486646 |
| hsa-miR-453     | 1 | 1 | 0 | 1 | 1 | 4 | -0.18111528  |
| hsa-miR-122     | 1 | 1 | 0 | 1 | 1 | 4 | -0.17491646  |
| hsa-let-7d      | 1 | 1 | 0 | 1 | 1 | 4 | -0.15269511  |
| hsa-miR-105     | 1 | 1 | 0 | 1 | 1 | 4 | -0.144955743 |
| hsa-miR-199a-3p | 1 | 1 | 0 | 1 | 1 | 4 | -0.105654071 |
| hsa-let-7g      | 1 | 1 | 0 | 1 | 1 | 4 | -0.089055111 |
| hsa-miR-362-3p  | 1 | 1 | 0 | 1 | 1 | 4 | -0.08437388  |
| hsa-miR-500     | 1 | 1 | 0 | 1 | 1 | 4 | -0.082383003 |
| hsa-miR-98      | 1 | 1 | 0 | 1 | 1 | 4 | -0.082048295 |
| hsa-miR-363     | 1 | 1 | 0 | 1 | 1 | 4 | -0.053390982 |
| hsa-miR-151-5p  | 1 | 1 | 0 | 1 | 1 | 4 | -0.033511396 |
| hsa-miR-346     | 1 | 1 | 0 | 1 | 1 | 4 | -0.031454018 |
| hsa-miR-202     | 1 | 1 | 0 | 1 | 1 | 4 | -0.008615639 |
| hsa-let-7e      | 1 | 1 | 0 | 1 | 1 | 4 | 0.008419887  |
| hsa-miR-149     | 1 | 1 | 0 | 1 | 1 | 4 | 0.017416473  |
| hsa-miR-138     | 1 | 1 | 0 | 1 | 1 | 4 | 0.062683401  |
| hsa-miR-425     | 1 | 1 | 0 | 1 | 1 | 4 | 0.065098424  |
| hsa-miR-374a    | 1 | 1 | 0 | 1 | 1 | 4 | 0.066932519  |
| hsa-miR-150     | 1 | 1 | 0 | 1 | 1 | 4 | 0.074929518  |
| hsa-let-7b      | 1 | 1 | 0 | 1 | 1 | 4 | 0.116088986  |
| hsa-miR-19a     | 1 | 1 | 0 | 1 | 1 | 4 | 0.117365658  |
| hsa-miR-330-3p  | 1 | 1 | 0 | 1 | 1 | 4 | 0.128661631  |
| hsa-miR-7       | 1 | 1 | 0 | 1 | 1 | 4 | 0.138410833  |
| hsa-miR-32      | 1 | 1 | 0 | 1 | 1 | 4 | 0.150256478  |
| hsa-miR-141     | 1 | 1 | 0 | 1 | 1 | 4 | 0.188593895  |
| hsa-miR-367     | 1 | 1 | 0 | 1 | 1 | 4 | 0.189292664  |
| hsa-let-7a      | 1 | 1 | 0 | 1 | 1 | 4 | 0.206898241  |
| hsa-let-7i      | 1 | 1 | 0 | 1 | 1 | 4 | 0.207458823  |
| hsa-miR-134     | 1 | 1 | 0 | 1 | 1 | 4 | 0.221479036  |

|                 |   |   |   |   |   |   |             |
|-----------------|---|---|---|---|---|---|-------------|
| hsa-miR-29c     | 1 | 1 | 0 | 1 | 1 | 4 | 0.24090292  |
| hsa-miR-19b     | 1 | 1 | 0 | 1 | 1 | 4 | 0.247703769 |
| hsa-miR-582-3p  | 1 | 1 | 0 | 1 | 1 | 4 | 0.249525388 |
| hsa-miR-29a     | 1 | 1 | 0 | 1 | 1 | 4 | 0.255231011 |
| hsa-miR-337-5p  | 1 | 1 | 0 | 1 | 1 | 4 | 0.301744803 |
| hsa-miR-124     | 1 | 1 | 0 | 1 | 1 | 4 | 0.349288691 |
| hsa-miR-379     | 1 | 1 | 0 | 1 | 1 | 4 | 0.349540931 |
| hsa-miR-432     | 1 | 1 | 0 | 1 | 1 | 4 | 0.381912725 |
| hsa-miR-377     | 1 | 1 | 0 | 1 | 1 | 4 | 0.411891362 |
| hsa-miR-495     | 1 | 1 | 0 | 1 | 1 | 4 | 0.415839972 |
| hsa-miR-329     | 1 | 1 | 0 | 1 | 1 | 4 | 0.431740287 |
| hsa-miR-380     | 1 | 1 | 0 | 1 | 1 | 4 | 0.444034145 |
| hsa-miR-544     | 1 | 1 | 0 | 1 | 1 | 4 | 0.481662953 |
| hsa-miR-29b     | 1 | 1 | 0 | 1 | 1 | 4 | 0.548662542 |
| hsa-miR-513a-3p | 0 | 1 | 1 | 1 | 1 | 4 | not present |
| hsa-miR-1205    | 0 | 1 | 1 | 1 | 1 | 4 | not present |
| hsa-miR-1244    | 0 | 1 | 1 | 1 | 1 | 4 | not present |
| hsa-miR-1278    | 0 | 1 | 1 | 1 | 1 | 4 | not present |
| hsa-miR-1290    | 0 | 1 | 1 | 1 | 1 | 4 | not present |
| hsa-miR-129-5p  | 1 | 1 | 0 | 1 | 1 | 4 | not present |
| hsa-miR-146b-5p | 1 | 1 | 0 | 1 | 1 | 4 | not present |
| hsa-miR-200a    | 1 | 1 | 0 | 1 | 1 | 4 | not present |
| hsa-miR-300     | 1 | 1 | 0 | 1 | 1 | 4 | not present |
| hsa-miR-455-3p  | 1 | 1 | 0 | 1 | 1 | 4 | not present |
| hsa-miR-527     | 1 | 1 | 0 | 1 | 1 | 4 | not present |
| hsa-miR-532-5p  | 1 | 1 | 0 | 1 | 1 | 4 | not present |
| hsa-miR-548b-3p | 1 | 1 | 0 | 1 | 1 | 4 | not present |
| hsa-miR-548c-3p | 1 | 1 | 0 | 1 | 1 | 4 | not present |
| hsa-miR-557     | 1 | 1 | 0 | 1 | 1 | 4 | not present |
| hsa-miR-563     | 1 | 1 | 0 | 1 | 1 | 4 | not present |
| hsa-miR-570     | 1 | 1 | 0 | 1 | 1 | 4 | not present |
| hsa-miR-573     | 1 | 1 | 0 | 1 | 1 | 4 | not present |
| hsa-miR-574-3p  | 1 | 1 | 0 | 1 | 1 | 4 | not present |
| hsa-miR-576-3p  | 1 | 1 | 0 | 1 | 1 | 4 | not present |
| hsa-miR-580     | 1 | 1 | 0 | 1 | 1 | 4 | not present |
| hsa-miR-583     | 1 | 1 | 0 | 1 | 1 | 4 | not present |
| hsa-miR-587     | 1 | 1 | 0 | 1 | 1 | 4 | not present |
| hsa-miR-589     | 1 | 1 | 0 | 1 | 1 | 4 | not present |
| hsa-miR-593     | 1 | 1 | 0 | 1 | 1 | 4 | not present |
| hsa-miR-605     | 1 | 1 | 0 | 1 | 1 | 4 | not present |
| hsa-miR-608     | 1 | 1 | 0 | 1 | 1 | 4 | not present |
| hsa-miR-626     | 1 | 1 | 0 | 1 | 1 | 4 | not present |
| hsa-miR-632     | 1 | 1 | 0 | 1 | 1 | 4 | not present |
| hsa-miR-635     | 1 | 1 | 0 | 1 | 1 | 4 | not present |
| hsa-miR-637     | 1 | 1 | 0 | 1 | 1 | 4 | not present |
| hsa-miR-646     | 1 | 1 | 0 | 1 | 1 | 4 | not present |
| hsa-miR-649     | 1 | 1 | 0 | 1 | 1 | 4 | not present |

|                 |   |   |   |   |   |   |              |
|-----------------|---|---|---|---|---|---|--------------|
| hsa-miR-655     | 1 | 1 | 0 | 1 | 1 | 4 | not present  |
| hsa-miR-661     | 1 | 1 | 0 | 1 | 1 | 4 | not present  |
| hsa-miR-708     | 1 | 1 | 0 | 1 | 1 | 4 | not present  |
| hsa-miR-874     | 1 | 1 | 0 | 1 | 1 | 4 | not present  |
| hsa-miR-875-5p  | 1 | 1 | 0 | 1 | 1 | 4 | not present  |
| hsa-miR-877     | 1 | 1 | 0 | 1 | 1 | 4 | not present  |
| hsa-miR-888     | 1 | 1 | 0 | 1 | 1 | 4 | not present  |
| hsa-miR-892a    | 1 | 1 | 0 | 1 | 1 | 4 | not present  |
| hsa-miR-920     | 1 | 1 | 0 | 1 | 1 | 4 | not present  |
| hsa-miR-942     | 1 | 1 | 0 | 1 | 1 | 4 | not present  |
| hsa-miR-146b-3p | 0 | 1 | 0 | 1 | 1 | 3 | −0.496128921 |
| hsa-miR-499-3p  | 1 | 1 | 0 | 1 | 0 | 3 | −0.477101216 |
| hsa-miR-186     | 1 | 1 | 0 | 1 | 0 | 3 | −0.453005253 |
| hsa-miR-125b    | 1 | 0 | 0 | 1 | 1 | 3 | −0.279894668 |
| hsa-miR-502-3p  | 1 | 1 | 0 | 1 | 0 | 3 | −0.262375458 |
| hsa-miR-342-5p  | 1 | 1 | 0 | 1 | 0 | 3 | −0.158341133 |
| hsa-miR-452*    | 1 | 1 | 0 | 1 | 0 | 3 | −0.146790971 |
| hsa-miR-501-3p  | 1 | 1 | 0 | 1 | 0 | 3 | −0.095258351 |
| hsa-miR-125a-5p | 1 | 0 | 0 | 1 | 1 | 3 | −0.034417242 |
| hsa-miR-198     | 0 | 1 | 0 | 1 | 1 | 3 | 0.072910084  |
| hsa-miR-490-5p  | 1 | 1 | 0 | 1 | 0 | 3 | 0.437364645  |
| hsa-miR-432*    | 1 | 1 | 0 | 1 | 0 | 3 | 0.464946699  |
| hsa-miR-380*    | 1 | 1 | 0 | 1 | 0 | 3 | 0.508346057  |
| hsa-miR-1275    | 0 | 1 | 0 | 1 | 1 | 3 | not present  |
| hsa-let-7b*     | 1 | 1 | 0 | 1 | 0 | 3 | not present  |
| hsa-let-7c*     | 1 | 1 | 0 | 1 | 0 | 3 | not present  |
| hsa-miR-1184    | 0 | 1 | 0 | 1 | 1 | 3 | not present  |
| hsa-miR-1228    | 0 | 1 | 0 | 1 | 1 | 3 | not present  |
| hsa-miR-1252    | 0 | 1 | 0 | 1 | 1 | 3 | not present  |
| hsa-miR-1254    | 0 | 1 | 0 | 1 | 1 | 3 | not present  |
| hsa-miR-1270    | 0 | 1 | 0 | 1 | 1 | 3 | not present  |
| hsa-miR-1287    | 0 | 1 | 0 | 1 | 1 | 3 | not present  |
| hsa-miR-1303    | 0 | 1 | 0 | 1 | 1 | 3 | not present  |
| hsa-miR-146a*   | 1 | 1 | 0 | 1 | 0 | 3 | not present  |
| hsa-miR-516b    | 1 | 1 | 0 | 1 | 0 | 3 | not present  |
| hsa-miR-556-3p  | 1 | 1 | 0 | 1 | 0 | 3 | not present  |
| hsa-miR-561     | 1 | 1 | 0 | 1 | 0 | 3 | not present  |
| hsa-miR-589*    | 1 | 1 | 0 | 1 | 0 | 3 | not present  |
| hsa-miR-590-5p  | 1 | 1 | 0 | 1 | 0 | 3 | not present  |
| hsa-miR-593*    | 1 | 1 | 0 | 1 | 0 | 3 | not present  |
| hsa-miR-596     | 1 | 1 | 0 | 1 | 0 | 3 | not present  |
| hsa-miR-603     | 1 | 1 | 0 | 1 | 0 | 3 | not present  |
| hsa-miR-664     | 0 | 1 | 0 | 1 | 1 | 3 | not present  |
| hsa-miR-93*     | 1 | 1 | 0 | 1 | 0 | 3 | not present  |
| hsa-miR-936     | 1 | 1 | 0 | 1 | 0 | 3 | not present  |

**Table S2.** Pyrosequencing analysis and qPCR validation of MB samples. Pyrosequencing analysis was performed on 32 MB tumor samples and 5 MB cell lines for DKK3 (1, 2 and 3 promoter). The results are shown as percentage of methylation of each site. DKK3 expression values by qPCR are reported for MB samples and MB cell lines in common with pyrosequencing analysis. DKK3 expression values relative to NC, lower than 0.5 were defined down-regulated.

| DKK3 Methylation results (%) |            |            |            |        |
|------------------------------|------------|------------|------------|--------|
| ID Sample                    | Promoter 1 | Promoter 2 | Promoter 3 | qPCR   |
| 37472                        | *          | 4.08       | *          | n.d.   |
| 37974                        | 3.32       | 4.29       | 6.62       | n.d.   |
| 153342                       | 2.18       | 3.15       | 5.78       | 0.1678 |
| 154904                       | 3.04       | 4.83       | 5.10       | 0.2978 |
| 181900                       | 2.22       | 3.80       | 4.13       | 0.4173 |
| 182059                       | 2.92       | 4.69       | 5.12       | 0.0480 |
| 188181                       | 1.32       | 4.07       | 2.18       | 0.0635 |
| 193263                       | 0.79       | 4.04       | 4.33       | 1.0603 |
| 195589                       | 3.44       | 6.02       | 3.39       | n.d.   |
| 195615                       | 1.92       | 3.99       | 4.88       | 0.1774 |
| 195627                       | 3.16       | 4.20       | 2.45       | n.d.   |
| 196684                       | 3.38       | 4.08       | 3.85       | n.d.   |
| #29                          | 5.29       | 5.41       | 11.64      | n.d.   |
| #32                          | 2.94       | 6.89       | 5.47       | n.d.   |
| #33                          | 6.51       | 6.86       | 7.12       | n.d.   |
| #45                          | 2.64       | 5.59       | 3.33       | n.d.   |
| 104-539B                     | 3.10       | 11.24      | 10.48      | n.d.   |
| 104-774                      | 3.05       | 4.79       | 4.24       | n.d.   |
| 160-I-00                     | 3.34       | 6.57       | *          | n.d.   |
| 180-I-00                     | 5.36       | *          | 5.07       | n.d.   |
| 2991-03                      | 1.79       | 5.89       | 2.96       | n.d.   |
| 3023-I-03                    | 3.37       | 6.97       | 3.23       | n.d.   |
| D283                         | 3.31       | 3.04       | 4.69       | 2.2068 |
| D341                         | 2.69       | 2.12       | 6.62       | 0.0001 |
| D425                         | 3.43       | 4.20       | 5.01       | 0.0012 |
| D458                         | 3.57       | 6.16       | 6.81       | 0.0001 |
| DAOY                         | 2.06       | 1.69       | 4.73       | 0.7596 |
| *D.                          | 3.83       | 5.76       | 6.72       | n.d.   |
| I05 - 2491                   | 11.98      | 25.75      | 5.12       | n.d.   |
| MB005                        | 1.98       | 6.41       | 3.09       | n.d.   |
| MB007                        | 5.06       | *          | *          | 0.0003 |
| MB008                        | 7.78       | *          | 22.00      | 2.0735 |
| MB009                        | 6.02       | 3.89       | 23.63      | 0.4276 |
| MB011                        | 2.77       | 6.02       | 3.50       | n.d.   |
| S.                           | *          | 4.10       | *          | n.d.   |

\*: failed; n.d.: not done.

**Table S3.** Summary of clinical information of patients enrolled in the study. Histological subtype was defined according to the current WHO [35]; Metastasis stage was defined following the Chang Classification [36]. Array-CGH data were performed by Coco *et al.* [31]. Gene Expression data were uploaded in GEO (GSE39182).

| Sex        | Age    | Metastasis | Surgical tumor       | Event   | Death   | Follow-up | Outcome           | Pyrosequencing | qPCR analysis | array-CGH | Gene Expression data |
|------------|--------|------------|----------------------|---------|---------|-----------|-------------------|----------------|---------------|-----------|----------------------|
|            |        |            | Residual             |         |         |           |                   |                |               |           |                      |
| F = Female | months | 0 = M0     | 0 = mikroskop. no    | 0 = no  | 0 = no  | months    | ANED: Alive, no   | 0 = no         | 0 = no        | 0 = no    | 0 = no               |
| M = Male   |        | 1 = M1     | tumo                 | 1 = yes | 1 = yes |           | evidence disease  | 1 = yes        | 1 = yes       | 1 = yes   | 1 = yes              |
|            |        | 2 = M2     | 1 = tumor residual   |         |         |           | AWD: Alive with   |                |               |           |                      |
|            |        | 3 = M3     | <1.5 cm <sup>2</sup> |         |         |           | disease DOD       |                |               |           |                      |
|            |        | 4 = M4     | 2 = tumor residual   |         |         |           | Dead with disease |                |               |           |                      |
|            |        |            | >1.5 cm <sup>2</sup> |         |         |           |                   |                |               |           |                      |
| M          | 95     | 0          | 1                    | 1       | 1       | 30        | DOD               | 1              | 0             | 0         | 0                    |
| F          | 97     | 0          | 0                    | 0       | 0       | 95        | ANED              | 1              | 0             | 0         | 0                    |
| F          | 60     | 0          | 0                    | 1       | 0       | 89        | ANED              | 0              | 1             | 0         | 0                    |
| M          | 29     | 0          | 2                    | 1       | 1       | 9         | DOD               | 0              | 1             | 0         | 0                    |
| M          | 20     | 0          | 0                    | 0       | 0       | 83        | ANED              | 0              | 1             | 0         | 0                    |
| F          | 17     | 0          | 0                    | 0       | 0       | 67        | ANED              | 0              | 1             | 0         | 0                    |
| M          | 92     | 0          | 0                    | 0       | 0       | 1329      | ANED              | 0              | 1             | 0         | 0                    |
| M          | 20     | 0          | 0                    | 0       | 0       | 78        | ANED              | 0              | 1             | 0         | 0                    |
| M          | 28     | 0          | 0                    | 1       | 1       | 18        | DOD               | 0              | 1             | 0         | 0                    |
| M          | 109    | 0          | 0                    | 1       | 1       | 5         | DOD               | 0              | 1             | 0         | 0                    |
| M          | 69     | 0          | 0                    | 1       | 1       | 14        | DOD               | 0              | 1             | 0         | 0                    |
| F          | 31     | 0          | 2                    | 1       | 1       | 12        | DOD               | 0              | 1             | 0         | 0                    |
| M          | 142    | 0          | 0                    | 1       | 1       | 46        | DOD               | 0              | 1             | 0         | 0                    |
| M          | 48     | 3          | 0                    | 1       | 1       | 6         | DOD               | 0              | 1             | 0         | 0                    |
| M          | 24     | 3          | 0                    | 1       | 1       | 7         | DOD               | 1              | 0             | 0         | 0                    |
| F          | 24     | 0          | 0                    | 1       | 1       | n.d.      | DOD               | 0              | 1             | 0         | 0                    |
| M          | 90     | 0          | 0                    | 0       | 0       | 37        | ANED              | 1              | 0             | 0         | 0                    |
| F          | 56     | 0          | 0                    | 0       | 0       | 40        | ANED              | 1              | 0             | 0         | 0                    |
| F          | 140    | 0          | 0                    | 0       | 0       | 117       | ANED              | 0              | 1             | 0         | 0                    |

|   |     |   |   |   |   |      |      |   |   |   |   |
|---|-----|---|---|---|---|------|------|---|---|---|---|
| F | 130 | 2 | 0 | 0 | 0 | 85   | ANED | 1 | 0 | 0 | 0 |
| F | 143 | 0 | 0 | 1 | 1 | 23   | DOD  | 1 | 0 | 0 | 0 |
| F | 50  | 3 | 0 | 1 | 1 | 18   | DOD  | 1 | 0 | 0 | 0 |
| M | 37  | 2 | 2 | 1 | 1 | 5    | DOD  | 1 | 0 | 0 | 0 |
| M | 76  | 3 | 1 | 1 | 1 | 10   | DOD  | 1 | 0 | 0 | 0 |
| M | 5   | 0 | 2 | 0 | 0 | 14   | DOD  | 1 | 0 | 0 | 0 |
| M | 176 | 2 | 0 | 1 | 1 | 21   | DOD  | 1 | 0 | 0 | 0 |
| M | 129 | 0 | 0 | 0 | 0 | 52   | ANED | 0 | 1 | 0 | 1 |
| M | 40  | 0 | 1 | 0 | 0 | 66   | ANED | 0 | 1 | 0 | 1 |
| M | 66  | 0 | 0 | 1 | 0 | 94   | ANED | 1 | 0 | 1 | 0 |
| M | 90  | 3 | 0 | 0 | 0 | 87   | ANED | 1 | 0 | 1 | 0 |
| M | 98  | 0 | 0 | 1 | 1 | 22   | DOD  | 1 | 1 | 1 | 0 |
| M | 39  | 0 | 0 | 0 | 0 | 155  | ANED | 1 | 1 | 1 | 0 |
| M | 142 | 0 | 0 | 0 | 0 | 137  | ANED | 1 | 0 | 1 | 0 |
| F | 135 | 0 | 1 | 0 | 0 | 135  | ANED | 1 | 0 | 1 | 0 |
| M | 82  | 0 | 1 | 1 | 1 | 69   | DOD  | 1 | 0 | 1 | 0 |
| M | 100 | 1 | 0 | 1 | 1 | 88   | DOD  | 1 | 0 | 1 | 0 |
| M | 104 | 3 | 2 | 1 | 1 | n.d. | DOD  | 1 | 0 | 1 | 0 |
| F | 59  | 0 | 1 | 0 | 0 | 76   | ANED | 1 | 0 | 1 | 0 |
| F | 45  | 0 | 0 | 1 | 1 | 74   | DOD  | 1 | 1 | 1 | 1 |
| M | 51  | 0 | 1 | 1 | 1 | 32   | DOD  | 1 | 1 | 1 | 1 |
| M | 49  | 0 | 1 | 1 | 1 | 20   | DOD  | 1 | 1 | 1 | 1 |
| M | 129 | 0 | 0 | 1 | 1 | 19   | DOD  | 1 | 1 | 1 | 1 |
| M | 141 | 2 | 0 | 1 | 1 | 28   | DOD  | 1 | 1 | 1 | 1 |
| M | 39  | 0 | 0 | 0 | 0 | 155  | ANED | 1 | 0 | 1 | 1 |
| F | 49  | 0 | 0 | 1 | 0 | 79   | ANED | 0 | 1 | 1 | 1 |
| M | 50  | 0 | 0 | 0 | 0 | 69   | ANED | 0 | 1 | 1 | 1 |
| M | 50  | 0 | 0 | 0 | 0 | 75   | ANED | 0 | 1 | 1 | 1 |
| M | 63  | 2 | 2 | 1 | 0 | 97   | ANED | 0 | 1 | 1 | 1 |
| F | 83  | 0 | 0 | 0 | 0 | 115  | ANED | 0 | 1 | 1 | 1 |
| F | 114 | 0 | 0 | 0 | 0 | 134  | ANED | 0 | 1 | 1 | 1 |

|   |     |   |   |   |   |     |      |   |   |   |   |
|---|-----|---|---|---|---|-----|------|---|---|---|---|
| M | 71  | 0 | 0 | 1 | 0 | 87  | AWD  | 1 | 1 | 1 | 1 |
| M | 155 | 0 | 0 | 0 | 0 | 169 | ANED | 1 | 1 | 1 | 1 |
| F | 117 | 0 | 0 | 0 | 0 | 127 | ANED | 1 | 1 | 1 | 1 |
| M | 27  | 0 | 0 | 1 | 0 | 31  | AWD  | 0 | 1 | 1 | 1 |
| F | 129 | 0 | 0 | 0 | 0 | 137 | ANED | 1 | 0 | 1 | 1 |

n.d.: not done.

**Table S4.** Oligonucleotides primers and PCR conditions used in the methylation study. Pyrosequencing and in Chromatin ImmunoPrecipitation (ChIP) was performed for DKK3 gene (1, 2 and 3 promoter) using specific primers.

| Pyrosequencing | Sense Primer 5'-3'                                                                                    | TA (°C) | Amplicon lenght (bp) |
|----------------|-------------------------------------------------------------------------------------------------------|---------|----------------------|
| DKK3 Pro 1     | Forward: CCCACCAAACCTCCCTCTC<br>Reverse: BIO-AGGGGTAGGTAGTGAAGGAGATG<br>Sequencing: CACCAAACCTCCCTCTC | 56.5    | 188                  |
| DKK3 Pro 2     | Forward: GGGAGGGGAYGATTTTGTGTA<br>Reverse: BIO-TTCCACCTCAAACCTCTCTCA<br>Sequencing: TTTTTTGGTGGATGTG  | 56      | 141                  |
| DKK3 Pro 3     | Forward: CCRCCRCCAACAACAAAC<br>Reverse: BIO-GGYGGGTGYGGGAAAGAGG<br>Sequencing: CAACAAAATAACCCCAA      | 62      | 196                  |
| CHIP           | Sense Primer 5'-3'                                                                                    | TA (°C) | PCR Cycles           |
| DKK3 Pro 1     | Forward: CCACTTCCACCTCAAGCCTCTCTC<br>Reverse: GAGCTCAGCCTCTCTTGGTGGATG                                | 60      | 40                   |
| DKK3 Pro 2     | Forward: AAGCCTGGAGGCCAGAGAA<br>Reverse: AGCGACCAGCTCTACCGAAG                                         | 60      | 40                   |
| DKK3 Pro 3     | Forward: GCTCAGCTTGTGCTCGAGGATG<br>Reverse: AGACGGGAGGAAACCGAGG                                       | 60      | 40                   |

PRO, promoter; TA (°C), Temperature of Annealing; UM, UnMethylated; M, Methylated.
